# Supplementary material for: Constitutive asymmetric dimerization drives oncogenic activation of epidermal growth factor receptor carboxyl-terminal deletion mutants
Source: PubMed Central journal article supplement (PMC4496187; doi:10.18632/oncotarget.3559), 2015-03-12
Supplement: oncotarget-06-8839-s001.pdf [file oncotarget-06-8839-s001.pdf]

# Constitutive asymmetric dimerization drives oncogenic activation of epidermal growth factor receptor carboxyl-terminal deletion mutants

## Supplementary Material

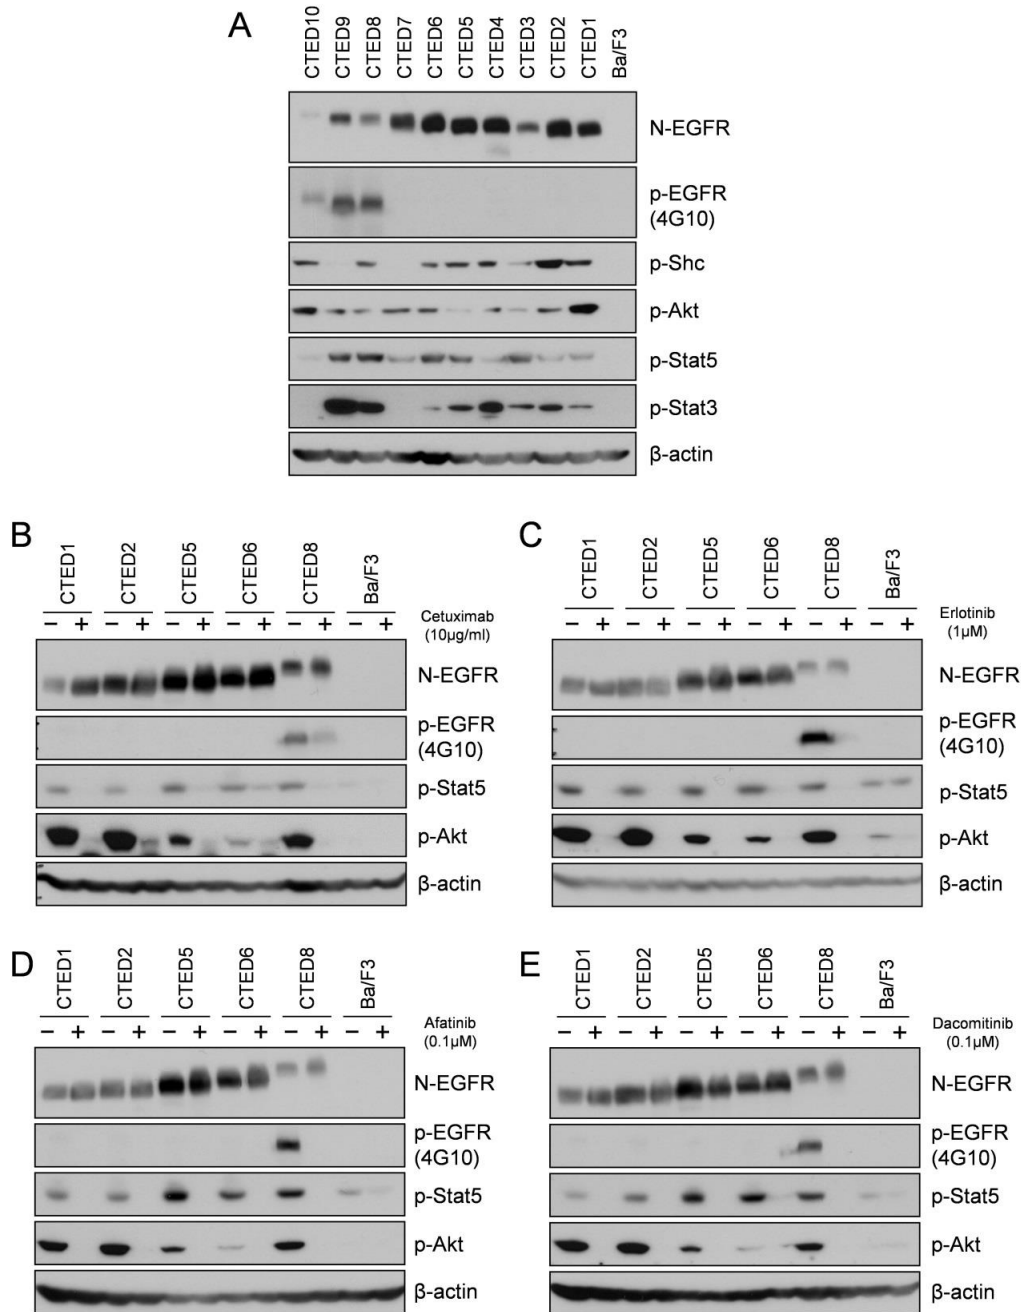

**Supplementary Figure S1: Pharmacologic effects of cetuximab, erlotinib, afatinib, and dacomitinib against oncogenic CTED mutants *in vitro*.** (A) Transformed Ba/F3 cells expressing the indicated EGFR CTED mutants were subjected to immunoblotting with phospho-tyrosine EGFR (4G10), phospho-Shc, phospho-Akt, phospho-Stat5, and phospho-Stat3 antibodies. Phosphorylation of EGFR, Stat5, and Akt were suppressed by either cetuximab (B), erlotinib (C), afatinib (D) or dacomitinib (E).
